# Supplementary material for: Ionic liquid capsules for cold-resistant leathers: connecting the three pillars of green chemicals, clean processes and green products
Source: Royal Society of Chemistry journal article supplement (doi:10.1039/d5gc05035a), 2026-01-01
Supplement: d5gc05035a1.pdf [file d5gc05035a1.pdf]

## **Ionic Liquid Capsules for Cold-Resistant Leather: Connecting Three Pillars of Green Chemicals, Clean Process and Green Products**

**Keerthivason Selladurai <sup>†</sup>, Madhan Kumar Meganathan <sup>‡</sup>, Sathya Ramalingam <sup>‡</sup>,**

**Nishad Fathima Nishter <sup>†</sup>, Raghava Rao Jonnalagadda <sup>†\*</sup>**

<sup>†</sup> Inorganic and Physical Chemistry Laboratory, Council of Scientific and Industrial Research-Central Leather Research Institute (CSIR-CLRI), Adyar, Chennai-600020, India.

<sup>‡</sup> Leather Process Technology Department, Council of Scientific and Industrial Research- Central Leather Research Institute (CSIR-CLRI), Adyar, Chennai-600020, India.

Email: [jrrao.clri@csir.res.in](mailto:jrrao.clri@csir.res.in)

## Supporting Information

**Table S1** Process recipe for making garment leather using chrome and zeolite tanned leathers

| Raw Materials: Chrome tanned and zeolite tanned leather (sheep) – Shaved thickness -0.9 mm |                                      |                              |             |            |            |                                 |                          |                          |                          |                                                  |
|--------------------------------------------------------------------------------------------|--------------------------------------|------------------------------|-------------|------------|------------|---------------------------------|--------------------------|--------------------------|--------------------------|--------------------------------------------------|
| <i>Process</i>                                                                             | <i>Chemical Name</i>                 | <i>% Offered<sup>#</sup></i> |             |            |            | <i>Duration (drumming time)</i> |                          |                          |                          | <i>Remarks</i>                                   |
|                                                                                            |                                      | <i>ENS</i>                   | <i>CTAB</i> | <i>SSE</i> | <i>SSP</i> | <i>ENS</i>                      | <i>CTAB</i>              | <i>SSE</i>               | <i>SSP</i>               |                                                  |
| <b>Neutralization</b>                                                                      | Water                                | 100                          | 100         | 100        | 100        |                                 |                          |                          |                          |                                                  |
|                                                                                            | Sodium formate                       | 1                            | 1           | 1          | 1          | (3 x 10 min) +                  | (3 x 10 min) +           | (3 x 10 min) +           | (3 x 10 min) +           | Cross-section pH<br>6.5 ±0.2<br>Drain/Wash/Drain |
|                                                                                            | Sodium bicarbonate                   | 1                            | 1           | 1          | 1          | 60 min                          | 60 min                   | 60 min                   | 60 min                   |                                                  |
| <b>Retanning</b>                                                                           | Low molecular weight phenolic syntan | 3                            | -           | -          | -          | (40 + 20 min)+<br>30 min        |                          |                          |                          |                                                  |
|                                                                                            | Melamine resin syntan                | 3                            | -           | -          | -          |                                 |                          |                          |                          |                                                  |
|                                                                                            | Protein filler                       | 2                            | -           | -          | -          |                                 |                          |                          |                          |                                                  |
| <b>Fatliquoring</b>                                                                        | Synthetic fatliquor                  | 6                            | 4           | 4          | 4          |                                 |                          |                          |                          |                                                  |
|                                                                                            | Semi synthetic fatliquor             | 6                            | 4           | 4          | 4          |                                 |                          |                          |                          |                                                  |
|                                                                                            | ENS                                  | 12                           | -           | -          | -          | 2 x 60 min                      | 2 x 60 min               | 2 x 60 min               | 2 x 60 min               |                                                  |
|                                                                                            | SS capsules system                   |                              | 14          | 14         | 14         |                                 |                          |                          |                          |                                                  |
| <b>Dyeing</b>                                                                              | Acid Blue 9 dye                      | 2*                           | 2*          | 2*         | 2*         | 60 min                          | 45 min                   | 30 min                   | 30 min                   | Check penetration                                |
| <b>Fixing</b>                                                                              | Formic acid                          | 3.5                          | 3.5         | 3.5        | 3.5        | (3 x 10 min) +<br>30 min        | (3 x 10 min) +<br>30 min | (3 x 10 min) +<br>30 min | (3 x 10 min) +<br>30 min | Check exhaustion /Drain                          |
| Next day: - Hooking/ Stacking/Toggling/Trimming/Buffering.                                 |                                      |                              |             |            |            |                                 |                          |                          |                          |                                                  |
| <sup>#</sup> Offer of chemicals based on the shaved weight                                 |                                      |                              |             |            |            |                                 |                          |                          |                          |                                                  |
| <sup>*</sup> Offer of chemicals based on the crust weight                                  |                                      |                              |             |            |            |                                 |                          |                          |                          |                                                  |

### Analytical Data:

**Oleic acid:** 1H NMR (400 MHz, DMSO-d<sub>6</sub>) δ 11.46 (s, 1H), 5.14 – 4.99 (m, 2H), 1.93 (t, J = 7.5 Hz, 2H), 1.76 (q, J = 6.3 Hz, 4H), 1.28 (t, J = 7.2 Hz, 2H), 1.15 – 0.92 (m, 20H), 0.62 (t, 3H). 13C NMR (101 MHz, DMSO-d<sub>6</sub>) δ 176.09, 129.70, 129.60, 55.01, 53.18, 53.14, 53.10, 31.34, 29.47, 29.28, 29.15, 29.09, 28.89, 28.81, 28.75, 28.64, 26.71, 26.61, 26.40, 22.15, 13.97.

**Cholinium Oleate:** 1H NMR (400 MHz, DMSO-d<sub>6</sub>) δ 5.33 – 5.29 (m, 2H), 3.85 – 3.82 (m, 3H), 3.44 – 3.41 (m, 2H), 3.12 (s, 8H), 1.96 (td, J = 7.3, 3.7 Hz, 4H), 1.86 (t, J = 7.5 Hz, 2H), 1.39 (t, J = 7.2 Hz, 2H), 1.29 – 1.17 (m, 20H), 1.05 (t, J = 7.0 Hz, 1H), 0.86 – 0.82 (m, 3H). 13C NMR (101 MHz, DMSO-d<sub>6</sub>) δ 174.84, 129.86, 34.26, 32.16, 29.98, 29.97, 29.80, 29.61, 29.58, 29.53, 29.47, 29.44, 27.36, 25.21, 22.89, 14.26.

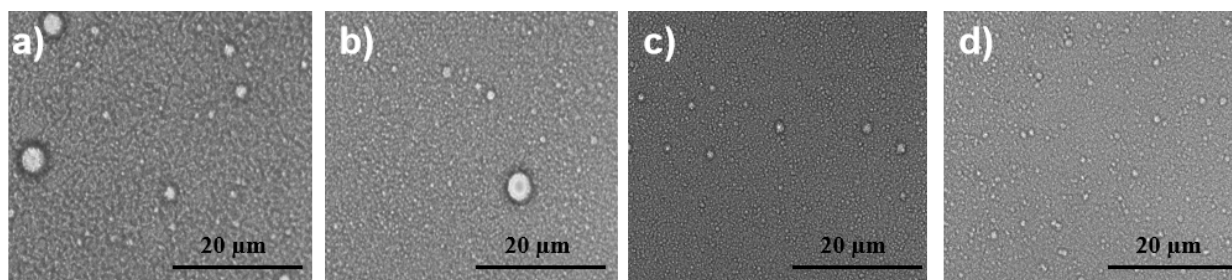

**Figure S1** Optical microscope images of silicone oil emulsion using a) CTAB, b) [Cho][Ole], c) [Cho][Ole]/EMIm EtSO<sub>4</sub> and d) [Cho][Ole]/[P<sub>66614</sub>][Dec].

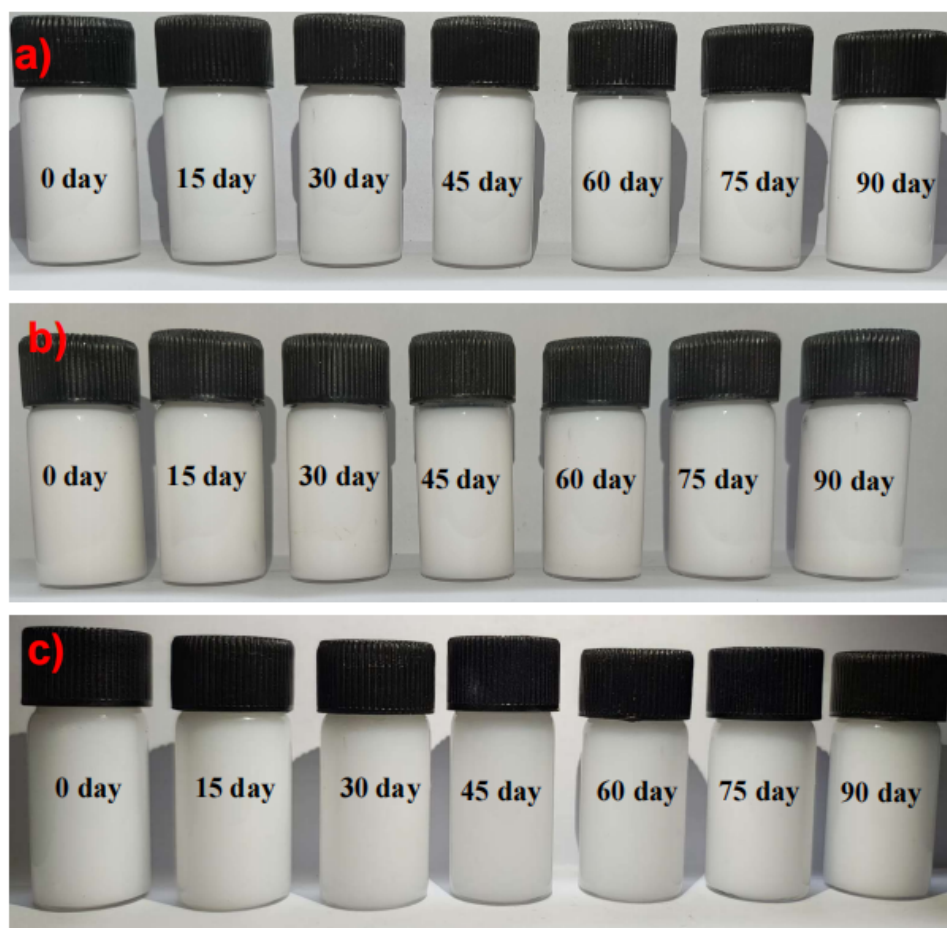

**Figure S2** Colour photographs of [Cho][Ole] ILs emulsion a) containing EMIm EtSO<sub>4</sub>, b) emulsion containing [P<sub>66614</sub>][Dec] and c) CTAB containing EMIm EtSO<sub>4</sub> for 90 days.

## Supporting Information

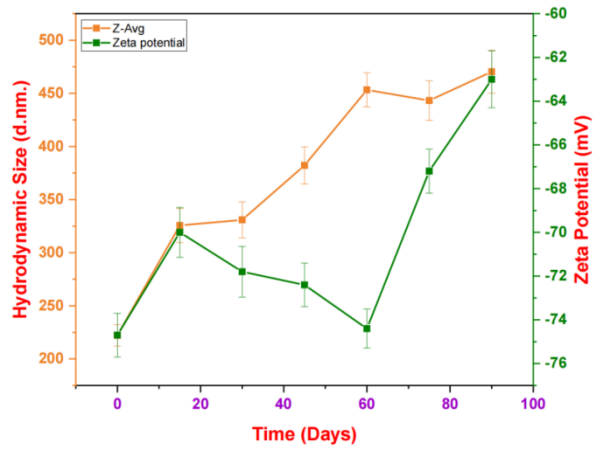

**Figure S3** Stability of CTAB emulsion for 90 days

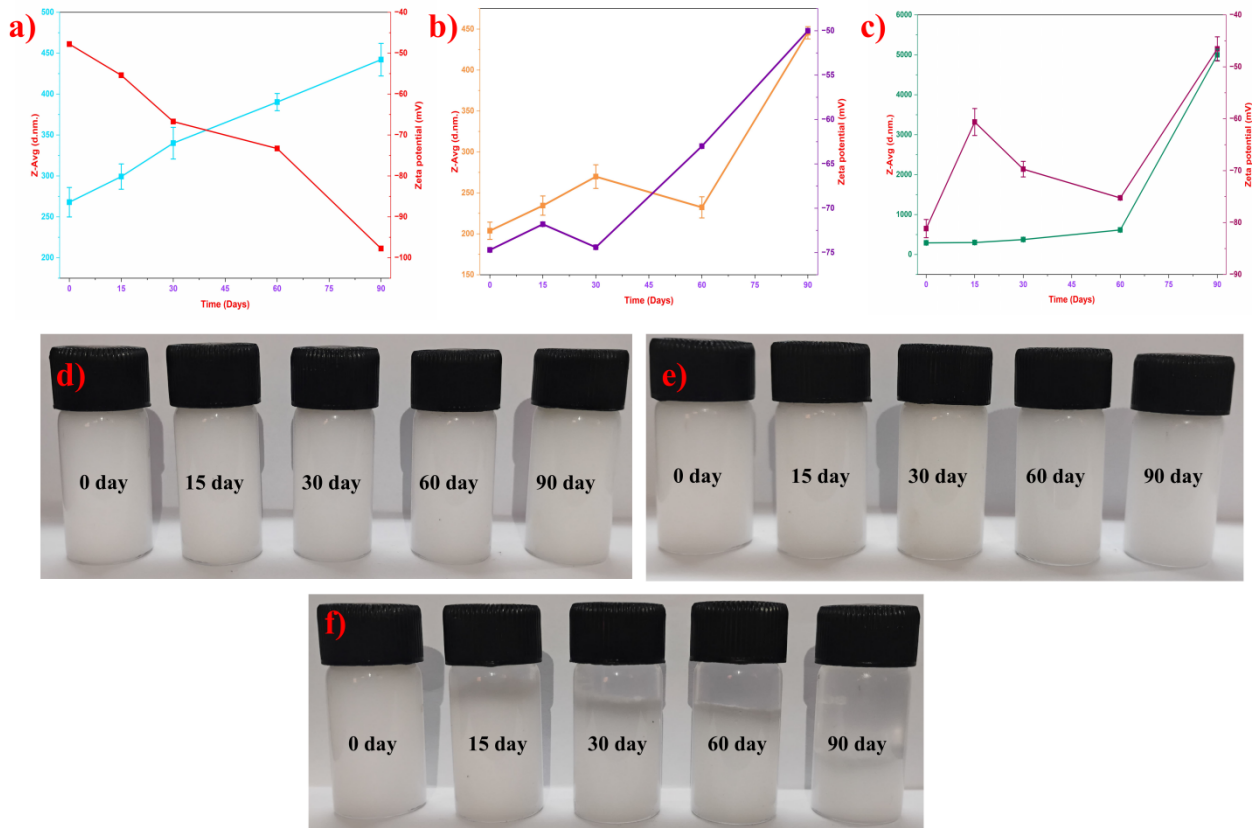

**Figure S4** Stability of a, d) SSE, b, e) SSP and c, f) CTAB capsules for 90 days and its respective colour photographs.

## Supporting Information

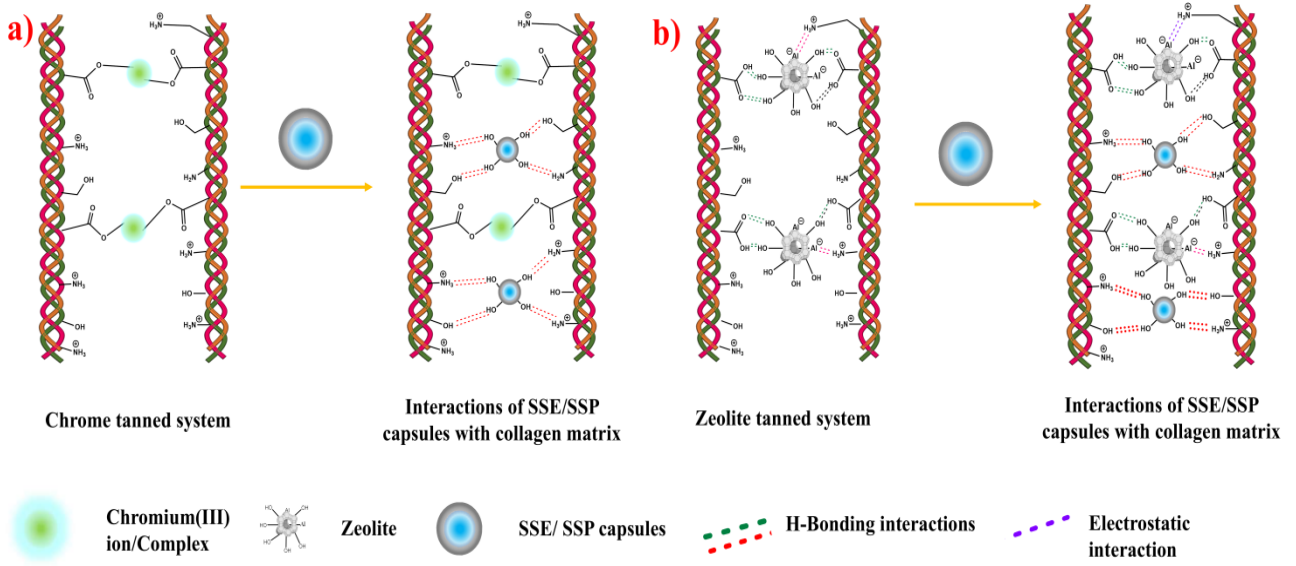

**Figure S5** Possible interactions of silica capsules (SSE/SSP) with chrome and zeolite tanned leathers

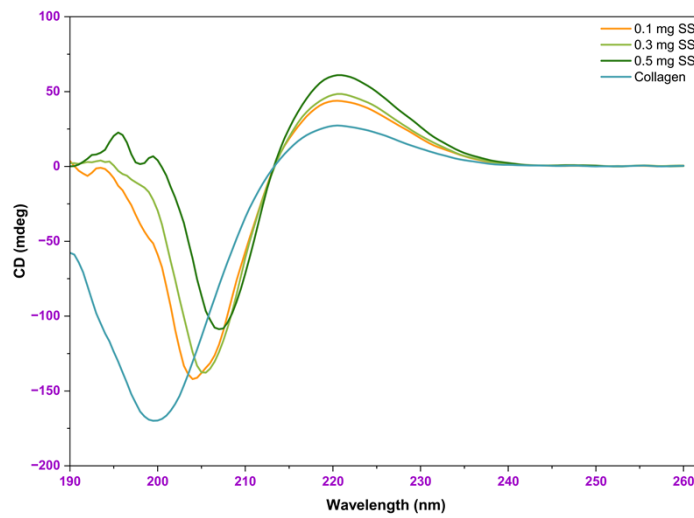

**Figure S6** Circular Dichroism (CD) spectra of collagen with silica capsules

## Supporting Information

**Table S2** Cold-resistant behaviour of IL-treated leathers in repeated room temperature to -20°C (thermal-cooling) Cycles.

| <b>System</b> | <b>Cycles</b>    | <b>Initial Temperature (°C)</b> | <b>Final Temperature (°C)</b> | <b>Temperature Difference (°C)</b> |
|---------------|------------------|---------------------------------|-------------------------------|------------------------------------|
| <b>ENS-C</b>  | <b>Cycle I</b>   | 23.2                            | 2.1                           | 21.1                               |
|               | <b>Cycle II</b>  | 23.1                            | 1.8                           | 21.3                               |
|               | <b>Cycle III</b> | 23.0                            | 1.8                           | 21.2                               |
| <b>CTAB-C</b> | <b>Cycle I</b>   | 23.2                            | 4.1                           | 19.1                               |
|               | <b>Cycle II</b>  | 25.2                            | 4.0                           | 21.2                               |
|               | <b>Cycle III</b> | 23.4                            | 4.2                           | 19.2                               |
| <b>SSE-C</b>  | <b>Cycle I</b>   | 25.8                            | 11.5                          | 14.3                               |
|               | <b>Cycle II</b>  | 24.3                            | 9.2                           | 15.1                               |
|               | <b>Cycle III</b> | 24.5                            | 10                            | 14.5                               |
| <b>SSP-C</b>  | <b>Cycle I</b>   | 24.7                            | 9.5                           | 15.2                               |
|               | <b>Cycle II</b>  | 25.1                            | 8.6                           | 16.5                               |
|               | <b>Cycle III</b> | 25.5                            | 7.9                           | 17.6                               |
| <b>ENS-Z</b>  | <b>Cycle I</b>   | 24.3                            | 4.4                           | 19.9                               |
|               | <b>Cycle II</b>  | 24.5                            | 5.0                           | 19.5                               |
|               | <b>Cycle III</b> | 25.5                            | 4.7                           | 20.8                               |
| <b>CTAB-Z</b> | <b>Cycle I</b>   | 24.2                            | 4.7                           | 19.5                               |
|               | <b>Cycle II</b>  | 24.0                            | 4.6                           | 19.4                               |
|               | <b>Cycle III</b> | 24.0                            | 4.0                           | 20                                 |
| <b>SSE-Z</b>  | <b>Cycle I</b>   | 23.7                            | 9.6                           | 14.1                               |
|               | <b>Cycle II</b>  | 23.5                            | 10.2                          | 13.3                               |
|               | <b>Cycle III</b> | 24.0                            | 9.9                           | 14.1                               |
| <b>SSP-Z</b>  | <b>Cycle I</b>   | 24.0                            | 5.1                           | 18.9                               |
|               | <b>Cycle II</b>  | 24.2                            | 4.2                           | 19                                 |
|               | <b>Cycle III</b> | 25.2                            | 5.8                           | 19.4                               |

**Table S3** Cold-resistant behaviour of IL-treated leathers at -20°C after 3 months.

| System | Initial Temperature (°C) | Final Temperature (°C) | Temperature Difference (°C) |
|--------|--------------------------|------------------------|-----------------------------|
| ENS-C  | 24.2 ± 0.1               | 0.7 ± 1.3              | 23.5 ± 1.2                  |
| CTAB-C | 24 ± 0.1                 | 1.2 ± 1.6              | 22.8 ± 1.5                  |
| SSE-C  | 24.3 ± 0.3               | 7.3 ± 1.1              | 17.0 ± 0.8                  |
| SSP-C  | 24.7 ± 0.1               | 5.9 ± 1.2              | 18.8 ± 1.1                  |
| ENS-Z  | 24.3 ± 0.3               | - 0.5 ± 1.3            | 24.8 ± 1                    |
| CTAB-Z | 24.2 ± 0.2               | - 1.0 ± 1.2            | 25.2 ± 1                    |
| SSE-Z  | 23.7 ± 0.1               | 7.5 ± 1.4              | 16.2 ± 1.3                  |
| SSP-Z  | 24.0 ± 0.2               | 3.6 ± 1.1              | 20.4 ± 0.9                  |

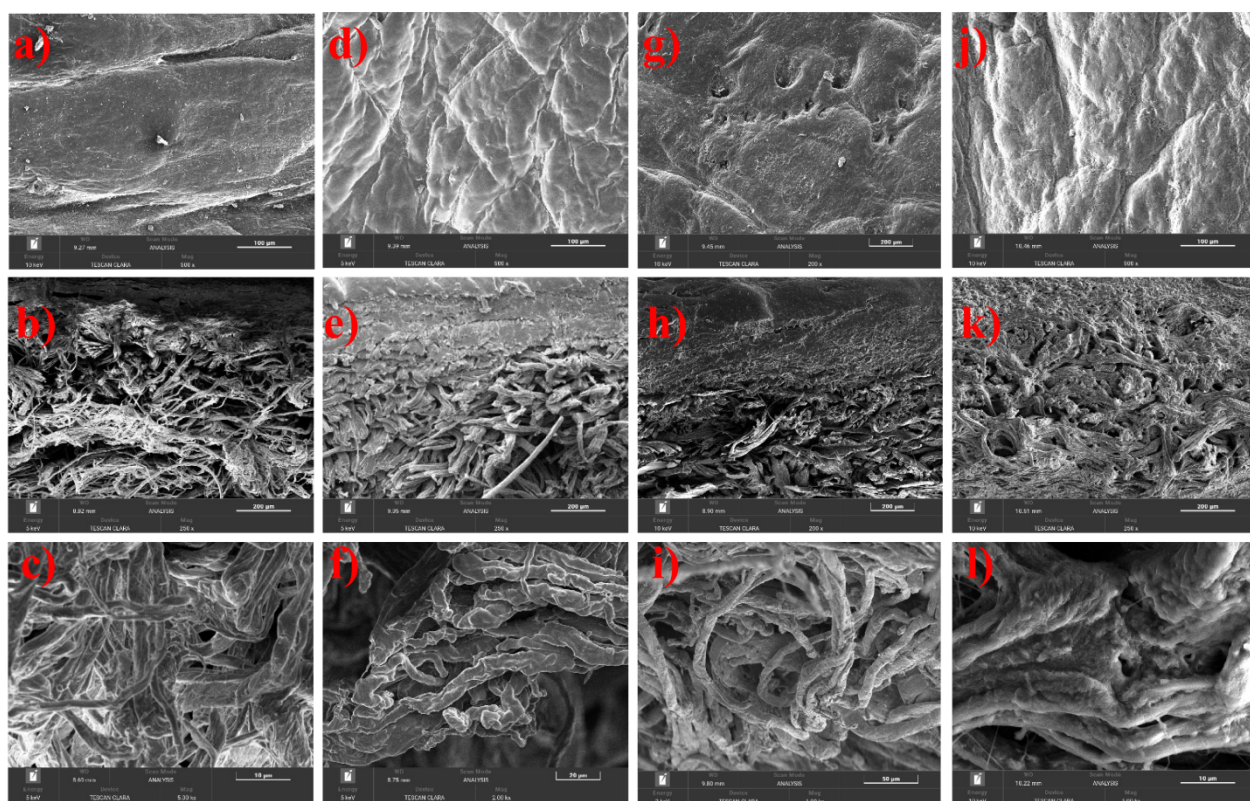**Figure S7** SEM images of surface and cross section of chrome tanned a-c) ENS, d-f) CTAB and zeolite tanned g-i) ENS and j-l) CTAB systems

## Supporting Information

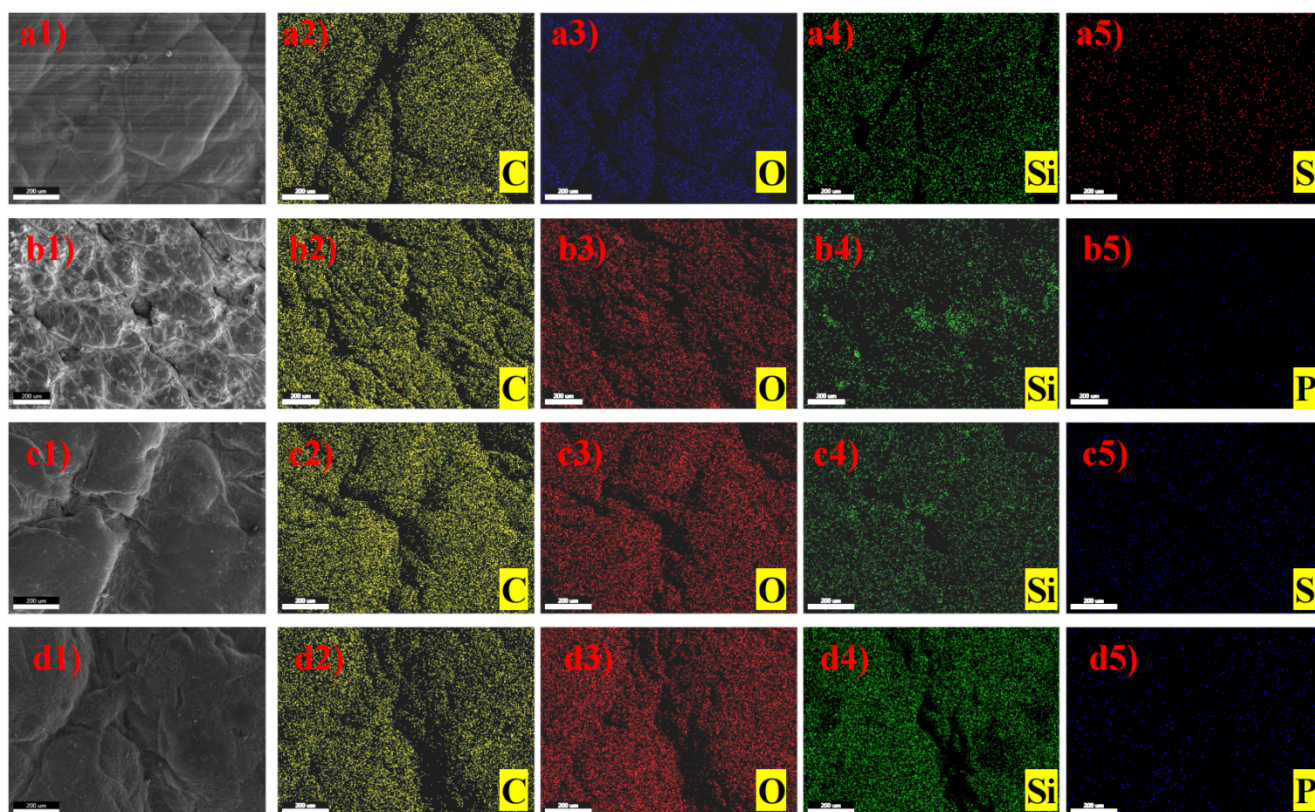

**Figure S8** SEM EDAX mapping of chrome tanned a1-a5) SSE, b1-b5) SSP and zeolite tanned c1-c5) SSE and d1-d5) SSP nanocapsules system

**Table S4** Colourfastness to circular rubbing, colourfastness to perspiration and lightfastness for SS treated chrome tanned and zeolite tanned systems

| Sample | Colourfastness to circular rubbing |         | Colourfastness to perspiration |        | Lightfastness to xenon lamp<br>(Blue wool rating) |
|--------|------------------------------------|---------|--------------------------------|--------|---------------------------------------------------|
|        | Dry-256                            | Wet-512 | Acid                           | Alkali |                                                   |
| ENS-C  | 4                                  | 4       | 4/5                            | 4/5    | 7                                                 |
| CTAB-C | 4                                  | 4       | 4/5                            | 4/5    | 7                                                 |
| SSE-C  | 4/5                                | 4       | 4/5                            | 4/5    | 7                                                 |
| SSP-C  | 4/5                                | 4       | 4/5                            | 4/5    | 7                                                 |
|        |                                    |         |                                |        |                                                   |
| ENS-Z  | 4                                  | 2/3     | 4/5                            | 4/5    | 7                                                 |
| CTAB-Z | 4                                  | 3       | 4/5                            | 4/5    | 7                                                 |
| SSE-Z  | 4/5                                | 3/4     | 4/5                            | 4/5    | 7                                                 |
| SSP-Z  | 4/5                                | 3/4     | 4/5                            | 4/5    | 7                                                 |

**Table S5** Comparison of cold-insulation materials reported in the literature with the current work.

| <b>Material</b>                                                             | <b>Cold Insulation Tested</b> | <b>Cold crack resistance Tested</b>          | <b>Brethability Tested</b> | <b>Treatment strategy</b>       |
|-----------------------------------------------------------------------------|-------------------------------|----------------------------------------------|----------------------------|---------------------------------|
| silicone oil-PMMA capsules <sup>1</sup>                                     | Yes (-25 °C)                  | No                                           | No                         | Surface coating                 |
| microencapsulated phase change materials based on hydrocarbons <sup>2</sup> | No                            | Yes (evaluated in terms of thermoregulation) | -                          | Surface coating                 |
| hexagonal boron nitride-PEG composites <sup>3</sup>                         | -17 ± 2 °C                    | No                                           | No                         | Surface coating                 |
| dioctyl adipate plasticizers <sup>4</sup>                                   | -                             | -60 °C                                       | No                         | Surface coating                 |
| IL-silicone oil loaded silica capsules                                      | -20 °C                        | -20 °C                                       | Yes                        | Fiber penetration-<br>This work |

**Table S6** Estimated Cost for Synthesis of Cholinium Oleate Ionic Liquid

| <b>Reagents</b>         | <b>Required quantity (g)</b> | <b>Cost / Kg (\$)</b> | <b>Cost (\$)</b> |
|-------------------------|------------------------------|-----------------------|------------------|
| Oleic acid              | 77.25                        | 2.26                  | 0.174            |
| Choline hydroxide       | 33.14                        | 1.45                  | 0.0480           |
| Ethanol                 | 300 mL                       | 1.04                  | 0.31             |
| <b>Product</b>          |                              |                       | <b>0.532</b>     |
| Cholinium Oleate (95 %) | 100                          |                       |                  |

\*For synthesis of 100g of Cholinium oleate

**Table S7** Estimated Cost for Emulsification of Silicone Oil using IL and CTAB

| Reagents                       | Required quantity (g) | Cost / Kg (\$) | Cost (\$)    |              |
|--------------------------------|-----------------------|----------------|--------------|--------------|
|                                |                       |                | IL system    | CTAB system  |
| Cholinium Oleate               | 15.42                 | 5.32           | 0.0820       | -            |
| Cetyltrimethylammonium bromide | 36.45                 | 20             | -            | 0.729        |
| Silicone oil                   | 1000g                 | 3.39           | 3.39         | 3.39         |
| <b>Total cost</b>              |                       |                | <b>3.472</b> | <b>4.119</b> |

\*All the prices were directly quoted from Indiamart.

**Table S8** Amount of surfactant and required for emulsification of Silicone oil (100 CPS) using Cholinium Oleate and Cetyltrimethylammonium bromide

| Reagents                       | Conventional Surfactant System | Ionic Liquid System |
|--------------------------------|--------------------------------|---------------------|
| Silicone oil                   | 1000 g                         | 1000 g              |
| Cetyltrimethylammonium bromide | 36.45 g                        | -                   |
| Cholinium Oleate               | -                              | 15.42 g             |
| Water                          | 2300 mL                        | 1000 mL             |
| <b>Product</b>                 |                                |                     |
| Silicone emulsion              | 3075 mL                        | 2040 mL             |

\*For emulsifying 1000 g of oil

## Supporting Information

**Table S9** Ecoscale score calculation for preparation of IL and CTAB assisted emulsion

| SI.No.                | Parameters                                                                             | Penalty Points                 |                                 |
|-----------------------|----------------------------------------------------------------------------------------|--------------------------------|---------------------------------|
|                       |                                                                                        | ILs assisted silicone emulsion | CTAB assisted silicone emulsion |
| 1                     | Yield                                                                                  | 0 (100 % )                     | -1.5 (97%)                      |
| 2                     | Price/availability                                                                     | 0                              | (CTAB) -2                       |
| 3                     | Safety                                                                                 | 0                              | (CTAB) -2                       |
| 4                     | Technical setup:<br>unconventional activation<br>technique (Ultrasonic<br>homoginizer) | -2                             | -2                              |
| 5                     | Temperature/time:<br>RT/ <1hr                                                          | 0                              | 0                               |
| 6                     | Workup and purification: None                                                          | 0                              | 0                               |
| <b>Ecoscale score</b> |                                                                                        | <b>98</b>                      | <b>92.5</b>                     |

**Table S10 Estimated Cost for Emulsification of Silica encapsulated Silicone Oil emulsion using IL and CTAB (with additional IL)**

| Reagents                                  | Required quantity (g) | Cost / Kg (\$) | Cost (\$)     |               |                                            |
|-------------------------------------------|-----------------------|----------------|---------------|---------------|--------------------------------------------|
|                                           |                       |                | IL system     |               | CTAB system (with EMIM EtSO <sub>4</sub> ) |
|                                           |                       |                | SSE           | SSP           |                                            |
| Cholinium Oleate                          | 15.42                 | 5.32           | 0.0820        | 0.0820        | -                                          |
| Cetyltrimethylammonium bromide            | 36.45                 | 20             | -             | -             | 0.729                                      |
| Silicone oil                              | 1000                  | 3.39           | 3.39          | 3.39          | 3.39                                       |
| 1-Ethyl-3-methylimidazolium ethyl sulfate | 50                    | 81.99          | 4.099         | -             | 4.099                                      |
| Trihexyltetradecylphosphonium decanoate   | 50                    | 163.99         | -             | 8.199         | -                                          |
| TEOS                                      | 2000 mL               | 1.16           | 2.32          | 2.32          | 2.32                                       |
| Aqueous ammonia                           | 1000 mL               | 0.31           | 0.31          | 0.31          | 0.31                                       |
| <b>Total cost</b>                         |                       |                | <b>10.201</b> | <b>14.301</b> | <b>10.848</b>                              |

\* for producing 10kg of leather

Supporting Information

**Table S11** Estimated cost for producing 1 ton of cold resistant leather

| <i>Chemicals</i>           | <i>Price per Kg (\$)</i> | <i>ENS</i> | <i>CTAB</i> | <i>IL system</i> |            |
|----------------------------|--------------------------|------------|-------------|------------------|------------|
|                            |                          |            |             | <i>SSE</i>       | <i>SSP</i> |
| <b>Retanning</b>           |                          |            |             |                  |            |
| Low weight phenolic syntan | 4.08                     | 122.4      | -           | -                | -          |
| Melamin resin syntan       | 3.78                     | 113.4      | -           | -                | -          |
| Protein filler             | 4.67                     | 93.4       | -           | -                | -          |
| <b>Fatliquoring</b>        |                          |            |             |                  |            |
| Synthetic fatliquors       | 6.2                      | 496        | 248         | 248              | 248        |
| Semi-synthetic fatliquors  | 5.60                     | 448        | 224         | 224              | 224        |
| ENS                        | 7.45                     | 894        | -           | -                | -          |
| SSE capsules               | 8.05                     | -          | -           | 1020.10          | -          |
| SSP capsules               | 11.28                    | -          | -           | -                | 1430.10    |
| CTAB capsules              | 8.75                     | -          | 1084.80     | -                | -          |
| <b>Dyeing &amp; fixing</b> |                          |            |             |                  |            |
| Acid blue 9                | 104.8                    | 104.8      | 104.8       | 104.8            | 104.8      |
| Formic acid                | 22.40                    | 22.40      | 22.40       | 22.40            | 22.40      |
| <b>Total cost</b>          |                          | 2295.4     | 1684        | 1619.3           | 2029.3     |

## Green Metrics

### For Emulsification

$$1. \text{ Water Intensity (WI)} = \frac{\text{Total Water used (mL)}}{\text{Mass of the Product (g)}}$$

$$\text{WI}_{(\text{IL})} = \frac{50}{102} = 0.490$$

$$\text{WI}_{(\text{CTAB})} = \frac{115}{154} = 0.746$$

$$2. \text{ Reaction Mass Efficiency (RME)} = \frac{\text{Mass of the product (g)}}{\text{Total Mass of the reactants (g)}} \times 100$$

$$\text{RME}_{(\text{IL})} = \frac{50}{50.771} = 99.23$$

$$\text{RME}_{(\text{CTAB})} = \frac{47.5}{51.822} = 91.65$$

$$3. \text{ Energy Intensity (EI)} = \frac{\text{Total Energy Used (kWh)}}{\text{Mass of the Product (Kg)}}$$

$$\text{EI}_{(\text{IL})} = \frac{0.25}{0.1} = 2.5$$

$$\text{EI}_{(\text{CTAB})} = \frac{0.375}{0.095} = 3.94$$

### For Leather Processing

$$1. \text{ Water Intensity (WI)} = \frac{\text{Total Water used (mL)}}{\text{Mass of the Product (g)}}$$

$$\text{WI}_{(\text{IL})} = \frac{300}{520} = 0.576$$

$$\text{WI}_{(\text{CTAB})} = \frac{375}{515} = 0.728$$

$$\text{WI}_{(\text{ENS})} = \frac{500}{510} = 0.980$$

$$2. \text{ Energy Intensity (EI)} = \frac{\text{Total Energy Used (kWh)}}{\text{Mass of the Product (Kg)}}$$

Supporting Information

$$EI_{(IL)} = \frac{5}{1.04} = 4.80$$

$$EI_{(CTAB)} = \frac{5}{1.03} = 4.85$$

$$EI_{(ENS)} = \frac{7}{1.03} = 6.79$$

**Table S12a** Green Metrics Comparison for ILs and conventional surfactant based Emulsion Preparation

| Green Metrics                                           | CTAB System (Conventional) | IL System ([Cho][Ole]) | Improvement |
|---------------------------------------------------------|----------------------------|------------------------|-------------|
| <i>Reaction Mass Efficiency (%)</i>                     | 91.65                      | 99.23                  | 8.3%        |
| <i>Eco-Scale Score</i>                                  | 92.5                       | 98                     | 5.9         |
| <i>Water Intensity (WI)</i>                             | 0.746                      | 0.490                  | 34.3 %      |
| <i>Surfactant Consumption (g/Kg of oil)</i>             | 36.45                      | 15.42                  | 57.69%      |
| <i>Emulsification Time (min.)</i>                       | 30                         | 20                     | 33%         |
| <i>Energy Consumption for Emulsification (kWh /Oil)</i> | 3.94                       | 2.5                    | 36.5 %      |
| <i>Cost of Emulsion Preparation (\$ / kg)</i>           | 4.12                       | 3.47                   | 16%         |

**Table S12b** Green Metrics Comparison for Leather processing (conventional and present report).

| Green Metrics                                              | Conventional ENS multi-step | IL-assisted single-step | Improvement |
|------------------------------------------------------------|-----------------------------|-------------------------|-------------|
| <i>Water Usage in Post-Tanning (L)</i>                     | 1.0                         | 0.6                     | 41%         |
| <i>Processing Time (h)</i>                                 | 7                           | 5.5                     | 21%         |
| <i>Energy Consumption (kWh)</i>                            | 6.79                        | 4.80                    | 29%         |
| <i>Carbon Footprint (process only) (CO<sub>2</sub> kg)</i> | 4.86                        | 3.43                    | 29%         |
| <i>Total Production Cost (1 tonne leather, \$)</i>         | 2,295.5                     | 1,684                   | 26.6%       |

### Supporting Information

|                                     |                 |                |                  |
|-------------------------------------|-----------------|----------------|------------------|
| <b><i>Wastewater COD (mg/L)</i></b> | 17600 (Chrome)  | 15200 (Chrome) | 13.6 % (Chrome)  |
|                                     | 15200 (Zeolite) | 8000 (Zeolite) | 47.3 % (Zeolite) |

## Supporting Information

### References

1. R. Sharma, N. Venkatesan and N. N. Fathima, *Materials Letters*, 2022, **329**, 133166.
2. A. I. Renzi, C. Carfagna and P. Persico, *Applied Thermal Engineering*, 2010, **30**, 1369-1376.
3. A. P Bhasi, N. Hanna Wilson and T. Palanisamy, *ACS omega*, 2022, **7**, 45120-45128.
4. *China Pat.*, CN102168382A, 2011.
